# Supplementary material
Source: PubMed Central journal article supplement (PMC7159086)
Supplement: mmc1.pdf [file mmc1.pdf]

# THE LANCET

## Supplementary appendix

This appendix formed part of the original submission and has been peer reviewed.  
We post it as supplied by the authors.

Supplement to: Chen N, Zhou M, Dong X, et al. Genomic characterisation and epidemiology of 2019 novel coronavirus: implications for virus origins and receptor binding. *Lancet* 2020; published online Jan 29. [http://dx.doi.org/10.1016/S0140-6736\(20\)30251-8](http://dx.doi.org/10.1016/S0140-6736(20)30251-8).

## Table of contents

| No.       | Supplementary figures and tables                                                                                                  | Page |
|-----------|-----------------------------------------------------------------------------------------------------------------------------------|------|
| Table S1  | Primers used for 5' and 3' end sequencing of the 2019-nCoV.                                                                       | 1    |
| Figure S1 | Phylogenetic analysis of the complete RdRp gene of 2019-nCoV and representative viruses of the subgenus <i>Sarbecoronavirus</i> . | 2    |
| Figure S2 | Phylogenetic analysis of separate gene regions of 2019-nCoV and representative viruses of the subgenus <i>Sarbecoronavirus</i> .  | 3    |
| Figure S3 | Sequence alignment of RBDs from 2019-nCoV related beta-CoVs.                                                                      | 4    |

**Table S1. Primers used for 5' and 3' end sequencing of the 2019-nCoV.**

| <b>Primer name</b> | <b>Primer sequence(5'-3')</b> |
|--------------------|-------------------------------|
| 5'raceR1           | CCATTGAAGGTGTCAAATTC          |
| 5'raceR2           | GACCATGAGGTGCAGTTCGA          |
| 3'raceF1           | GCTGGTTCCTATAAAGATTGG         |
| 3'raceF2           | CAGCAAAGTGTGACTCTTCTTC        |

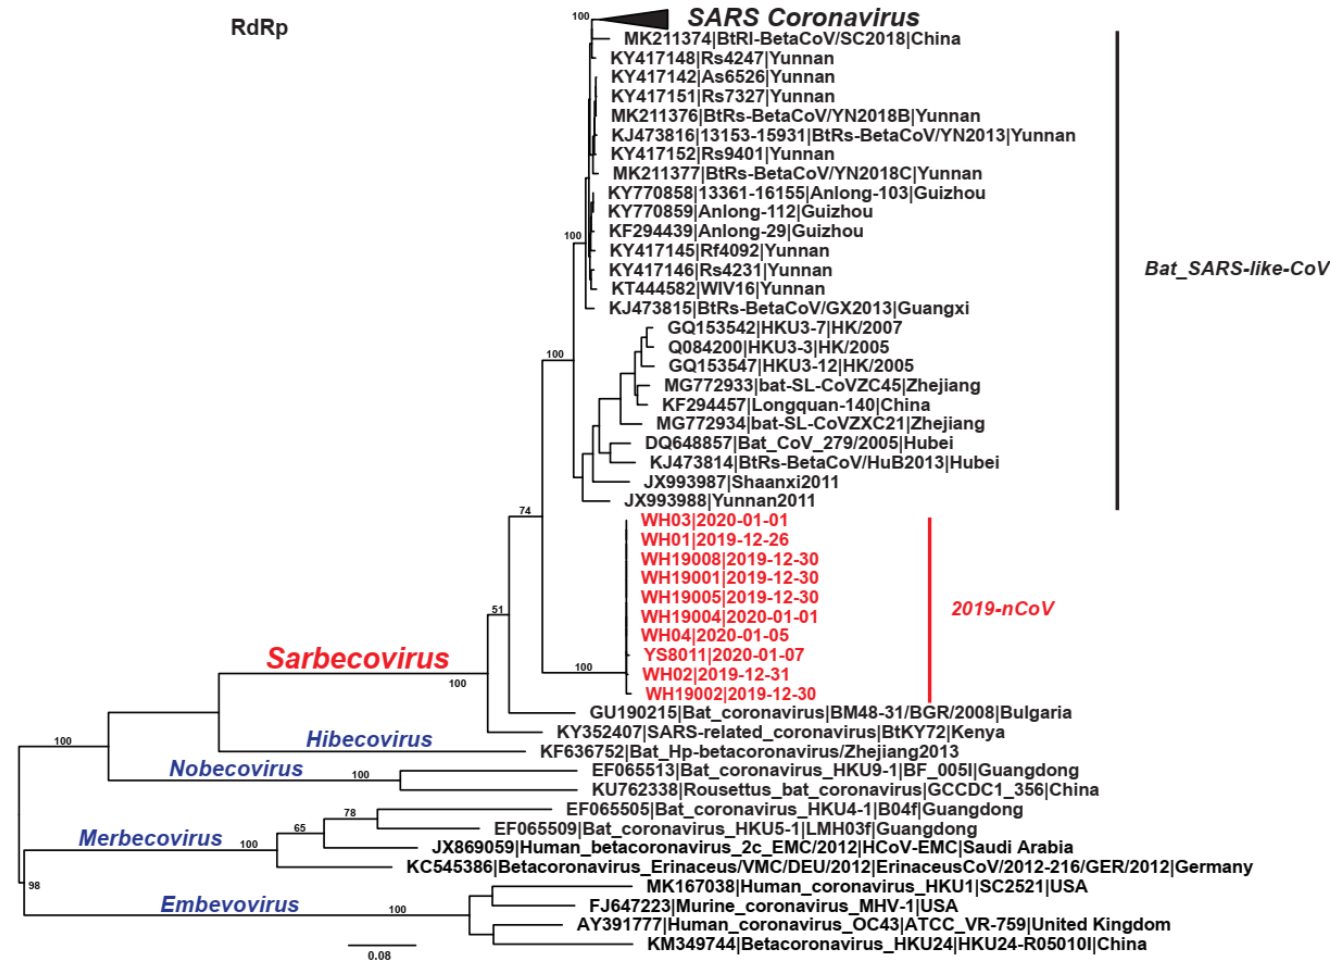

Figure S1. Phylogenetic analysis of the complete RdRp gene of 2019-nCoV and representative viruses of the subgenus *Sarbecoronavirus*.

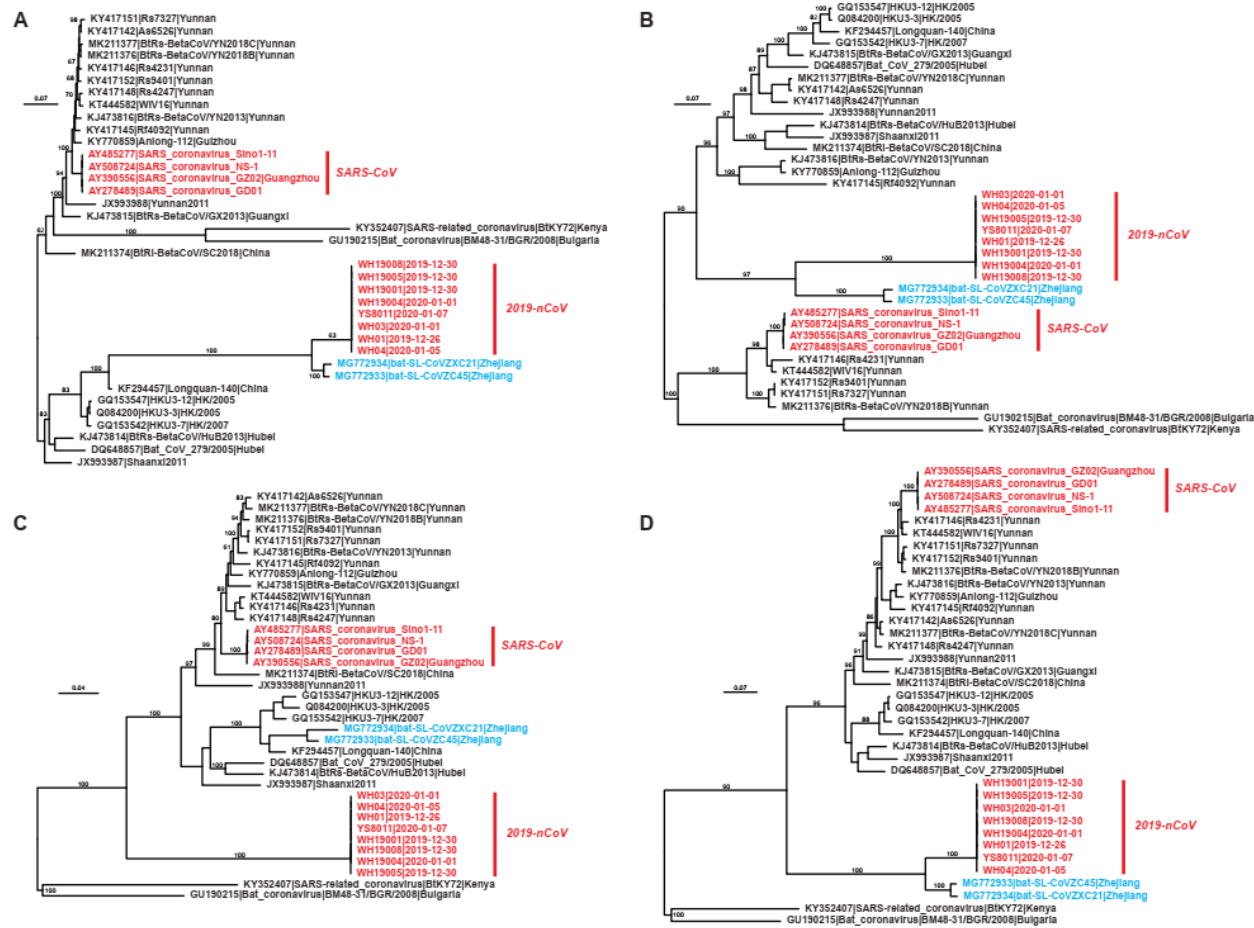

Figure S2. Phylogenetic analysis of separate gene regions of 2019-nCoV and representative viruses of the subgenus *Sarbecoronavirus*.

Panel A: 1a gene; panel B: spike; panel C: 1b gene; panel D: the gene regions excluding 1b. All the trees are midpoint rooted.
